# Supplementary material
Source: Elsevier journal article supplement (https://www.sciencedirect.com/science/article/pii/S0870255121000354)
Supplement: mmc1 [file S0870255121000354:mmc1.pdf]

# Supplementary material

**Table S1: Annual costs, per type of CVE (sensitivity analyses) Friction Cost Method, the costs are presented in Euros as mean (SD)**

|                                    | ACS (N=39)           | Stroke (N=31)        |
|------------------------------------|----------------------|----------------------|
| Patient absenteeism                | 3,426 (2,628)        | 4,626 (5,984)        |
| Initial hospitalisation+sick leave | 3,104 (2,459)        | 3,407 (2,780)        |
| Absenteeism at work                | 321 (1,092)          | 1,219 (4,832)        |
| Patient presenteeism               | 179 (591)            | 805 (2,331)          |
| Caregiver loss                     | 1,144 (4,847)        | 1,340 (4,322)        |
| <b>Total indirect costs</b>        | <b>4,749 (6,328)</b> | <b>6,770 (9,933)</b> |
